# Supplementary material for: Snow albedo sensitivity to macroscopic surface roughness using a new ray tracing model
Source: Copernicus journal article supplement (doi:10.5194/tc-2019-179), 2019-08-30
Supplement: Supplementary file [file tc-2019-179-AC1-supplement.pdf]

# Answer to Referee #1

-- Comments and questions of reviewers in black

-- Answer to reviewers in blue

## Anonymous Referee #1

Received and published: 20 November 2019

Authors measured spectral albedo in a flat smooth and an artificial rough surface, and developed a new ray tracing model to quantify the effects of the macroscopic surface roughness on the snow albedo. Reviewer gives a certain appreciation for the reasons; authors showed that the presence of macroscopic surface roughness significantly decreases snow albedo. Furthermore, snow albedo depends on the fraction of roughness feature, solar zenith angle and relative azimuth angle between the sun and the surface roughness orientation. However, **the explanations of some results are insufficient**. Particularly, reviewer cannot understand the reason why spectral albedo exceeded 1.0. It is not a realistic in nature. In addition, **reviewer is wondering whether the RSRT model can represent the measurement data even in the flat smooth surface** from the results of comparison between simulated spectral albedos and measured ones. Thus, it is questionable whether all simulation including results of sensitivity analyses are true. Reviewer supposes there are new findings about this research (regarding measurement data). Thus, the manuscript would have a merit for the publication in the TC. But, simulation results would be insufficient at this moment. **Authors should carefully confirm the results and then provide a detailed explanation or modify the structure of the manuscript.**

First of all, the authors thank the reviewer for the constructive review of the manuscript. In this section, we provide a brief description of the major changes applied in the new version of the manuscript following the reviewer's comments.

In the case of a flat smooth surface, albedo simulations with the RSRT model are the same as simulations using the ART theory (Kokhanovsky and Zege, 2004; see Section 3.1). For dry snow, numerous studies have shown a good agreement between the albedo simulated with the ART theory and observations over smooth surfaces (Dumont et al., 2017; Wang et al., 2017).

New sections have been added to clearly evaluate RSRT simulations in presence of surface roughness, and to explain why albedo values may be above 1 in the visible range. Overall, a strong effort has been made to make the text clearer (see the track change version of the manuscript). As suggested by the reviewer, we changed the structure of the manuscript by adding two new sections (new 2.4 and 4.1) to explain results with more details.

### New Section 4.1:

An entire section has been introduced at the beginning of the Results section to investigate the performance of the RSRT model, before the sensitivity analysis. We think that the accuracy of simulations are more transparent now. In particular, we explain why the simulated spectra do not overlap perfectly observed spectra.

- In the visible, measurements and simulations differ in the 600-700 nm range probably because of the concentration of impurities which are not considered in our simulations (since not measured). Note that the RSRT model is capable of accounting for impurities if they are measured.

- In the NIR domain it is probably because of a small bias in SSA measurements (10% uncertainty). The albedo-SSA relation in the NIR is linear, meaning that a variation of 10% of SSA induces a variation of  $\pm 0.01$  of albedo. Here, the difference between simulated and measured spectra in the NIR domain is below 0.01 and may come from SSA uncertainties. The impact of measurement errors in our sensitivity analysis is discussed in detail in Section 4.3.

Hence, measured and simulated spectra differ slightly due to inherent measurement errors. Nevertheless, the RSRT model improves the spectral albedo simulations by taking roughness into account, compared to simulations which neglect them (i.e. considering a flat surface, see Figures 6 and 7). Considering all observations, albedo simulations with the RSRT model are improved by a factor 2 by accounting for surface roughness compared to those neglecting them, which is significant.

To the best of our knowledge, this is the first model capable of simulating spectral albedo taking into account the actual surface roughness, the slope and snow optical properties using a Monte Carlo photon transport algorithm.

#### New Section 2.1 :

We detailed why the measured and simulated albedo values may exceed 1 in the visible range with a new Section in the Methodology section. Explanations are given further in the Major Comments section.

#### **Major comments**

**1.** In Fig. 5, all the simulated spectral albedos exceed 1.0 in the wavelength region of  $< 700$  nm even in the case of the flat smooth surface. Also, the measured spectral albedos exceeded 1.0 in the range of  $< 870$  nm in Fig. 7. These results are not realistic in nature and misleading information. Reviewer recommends explaining the reason why spectral albedos exceed 1.0.

The reason why we have albedo values over 1 is the presence of a sun-facing slope, and because here we consider apparent albedo, and not intrinsic albedo (i.e. albedo of a flat terrain): When the terrain is not flat, the horizontal sensor acquiring the snow reflectance is not perfectly parallel to the snow surface, and thus the ratio of the readings from the sensor when measuring the incoming irradiance and the snow reflectance (called the apparent or measured albedo) is different from the intrinsic surface albedo (true albedo = with a perfectly flat surface). Picard et al. (2020) fully detailed these slope effects on the measured albedo, which may be over 1 when the slope is facing the sun, even with perfect instruments and even for weak slopes  $\sim 2^\circ$ . This slope effect, inducing measured spectral albedo in the visible range above 1, has been observed in numerous previous studies (Grenfell et al, 1994 ; Wuttke et al., 2006 ; Dumont et al., 2017), and it has been demonstrated that it is because there is a higher interception probability of the sun beam by these slopes facing the sun compared to horizontal surfaces (Picard et al., 2020).

Of course, the apparent albedo does not represent the well-known reflectance, the energy is not conserved and it must not be used for energy budget calculations (where a flat terrain has to be considered). It is correct to simulate the apparent albedo here since the goal was to validate RSRT with apparent albedo observations.

To show an example of the slope effect on measurements, Figure 1 illustrates a comparison of two measured spectra acquired over two smooth surfaces in the French Alps in clear sky condition: one with a slope facing away the sun and one with a sun-facing slope. Snow conditions at the surface were similar, with close SSA values. The presence of the slope facing the sun induces a distortion of the spectra, with values above 1 in the visible and a concave spectral shape. When a small slope is facing back the sun, the pattern of the spectra shows no distortions, and the presence of a slope is difficult to detect. If they are not taken into account, slopes may induce strong biases in snow parameters estimated from optical measurements.

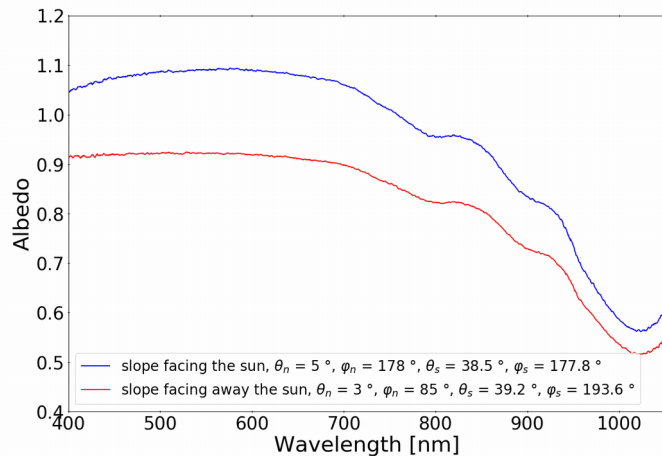

**Figure 1. Measured spectral albedo with Solalb over two smooth tiled surfaces having similar snow properties. Measurements are acquired in clear sky conditions. One surface has a 5° slope facing the sun (blue line) and the other has a 3° slope facing away the sun (red line).**

Several changes have been made in the text to be clearer on this point, and we detailed them in the following.

- The notion of observed apparent albedo is introduced in Section 2.2

L. 180 : « The observed apparent albedo, hereinafter referred to as  $\alpha_{obs}$ , is the processed spectrum measured with Solalb, considering the sensor in a horizontal position (Sicart et al., 2001). »

- In Section 2.3 we cancelled the part explaining slope measurements, and we added an entire new section further (now Section 2.4) to explain more clearly the impact of slope on the measured albedo, and slope measurements. The following text has been introduced, with a new figure (now Figure 4) to illustrate our arguments:

Line 212: « In the case of a tilted surface, Solalb is not perfectly parallel to the snow surface, and therefore the ratio of values acquired by the sensor when it measures the downwelling and the upwelling spectral irradiance (i.e  $\alpha_{obs}$ ) differs from the intrinsic surface albedo (called true albedo in previous studies, i.e measured with a perfectly flat surface) (Picard et al., 2020). Indeed, when the sensor is horizontal, the titled surface receives sun radiation with a different incidence angle and is viewed with a reduced solid angle by the sensor (Grenfell et al, 1994; Wuttke et al., 2006; Dumont et al., 2017). With surfaces having a sun-facing slope, it has been demonstrated that measured albedo values may be over 1 in the visible range (the spectra are distorted with a concave shape), because there is a higher interception probability of the sun beam by these slopes facing the sun compared to horizontal surfaces (Picard et al., 2020). Therefore, measured albedo may exceed 1 in the visible range, while it is unrealistic for the intrinsic albedo that is strictly ranged between 0 and 1. Of course, the measured albedo does not represent the well-known reflectance, the energy is not conserved and it must not be used for energy budget calculations (where a flat terrain has to be considered).

In this study, surfaces of experiments A, B and C have small sun-facing slopes (Table 3), and the slope effects does not have to be neglected in albedo simulations since even a small slope (Dumont et al 2017).»

- Concerning field experiments, there were no perfect flat surfaces and even the studied smooth surfaces had small slopes (it is very difficult to find a perfectly flat surface in the field). In

experiments A, B, C (Fig. 5 and 7) measurements are above 1 in the visible range because surfaces have a sun-facing slope.

L.149 : « *There are no perfectly flat surfaces in this study since it is difficult to find such surfaces in the field, and thus all studied surfaces have small slopes. In particular, it is noteworthy that experiments A, B and C have a small sun-facing slope.*»

- Concerning simulations, we modelled the apparent/measured albedo in order to be compared with measurements. The distortion of the spectra due to the presence of the slope is modeled with the K factor introduced by Dumont et al. 2017.

L. 272 « *As shown by Dumont et al. (2017), the K factor is the relative change in the cosine of the sun effective incident angle to the slope, and makes it possible to reproduce the distortion of the spectra due to the presence of the slope (with potential albedo values above 1 in the case of a sun-facing slope).*»

- In the Results section, we added the following sentence to explain why the albedo values are above 1 when  $\lambda < 700\text{nm}$  :

For experiments A and B, in Section 4.1, L. 419: «*Both surfaces have a sun-facing slope (3.1° for experiment A and 3.6° for experiment B, see Table 1), so albedo values above 1 in the visible range are not surprising (see Sect. 2.4).* »

For experiment C in Section 4.1 : L.451: «*For experiment C, apparent albedo exceeds 1 in the visible range because of the presence of a sun-facing slope (3.3° - 4°, see Table 1).* »

2. Simulated spectral albedos were not consistent with measured ones as a whole. There are some discrepancies between them. For example, the measured variation  $\Delta\alpha$  shows a clear dependence on  $\Delta\phi_r$  while the simulated one doesn't (Fig. 8). Reviewer supposes that the measurement values presented here are true. Thus, I am wondering whether the RSRT model provides certain values or not. Authors need to show the agreement between the model and the measurement to present how the proposed model works properly. Otherwise, it could be difficult to achieve the objective of this study which is to quantify the impact of surface roughness on snow albedo.

- Agreements between the model and the measurements are shown in the new section 4.1 'RSRT evaluation'. We show that simulations accounting for the surface roughness are more accurate by about a factor 2 at 700 nm and 1000 nm compared to those neglecting them (i.e ART theory with a flat terrain), which is significant.

L.460: « *Considering all observations, albedo simulations with the RSRT model are improved by a factor 2 by accounting for surface roughness ( $\alpha_{sim,rough}$ ) at 700 nm and 1000 nm compared to those neglecting them ( $\alpha_{sim,smooth}$ ), with an average RMSD of 0.03 at 700 nm and 0.04 at 1000 nm (Table 3). To the best of our knowledge, this is the first model capable of simulating spectral albedo taking into account the actual surface roughness, the topography and snow optical properties using a Monte Carlo photon transport algorithm.*»

In addition, we modified Figures 6 and 7 to illustrate the spectral performance of the RSRT model for all experiments. The differences between measured and simulated albedo spectra are explained as follows :

L. 426: « *For both experiments, the pattern of the measured spectra between 600-700 nm is probably led by the presence of impurities (not visible to the naked eye on the field). Previous studies showed that a even a small concentration of snow LAPs induces a drastic decrease of the albedo in the visible range (Warren, 1984; Dumont et al., 2017), and may explain why measurements and simulations differs in the 600-700 nm range. Moreover, the two spectra do not overlap perfectly in the NIR domain, but differences are below 0.01, and it is probably because of a small bias on SSA measurements (10% uncertainty). Overall, taking into account the measurement*

errors,  $\alpha_{sim,rough}$  spectra reproduces the observed spectra well for both experiments and the RSRT model improves the spectral albedo simulations by accounting for roughness, compared to those which neglect them (Fig. 6).”

- To answer to the reviewer about the Fig. 8 (now Fig. 9) : there is a dependence between measured variation  $\Delta\alpha$  and  $\Delta\phi_r$ , but it is misleading due to the presence of different contributions that change the albedo. It looks like measured  $\Delta\alpha$  increases when  $\Delta\phi_r$  goes from  $42^\circ$  to  $72^\circ$  (i.e. becomes closer to  $90^\circ$ ). It means that the roughness effect on albedo values is lower when the roughness orientation is closer to be perpendicular to the sun than parallel. This measured trend is opposite of what we find in the literature, as shown by Warren (1998). The Figure 2 (from Warren, 1998) illustrates the reduction in albedo when the roughness orientation becomes closer to  $90^\circ$ . RSRT simulations reproduce well this trend in Figure 9c and 9d. Authors guess that the measured trend is due to the melting observed in the field, resulting in a smoothing of roughness features throughout the day. Hence, we can not conclude on this observed trend since several contributions disturbed the measured albedo. We detailed it in the text as follows :

L. 556: « In Fig. 9c and 9f, the  $\Delta\alpha_{obs}$  increases when  $\Delta\phi_r$  goes from  $42^\circ$  to  $72^\circ$ , while in theory it should decrease when  $\Delta\phi_r$  approaches  $90^\circ$ . A possible explanation is that melting was observed at the surface in the field, resulting in a smoothing of our roughness shapes during the day, which attenuates the roughness effect on albedo values. Therefore, we can not conclude on this observed trend since several contributions disturbed the measured albedo. »

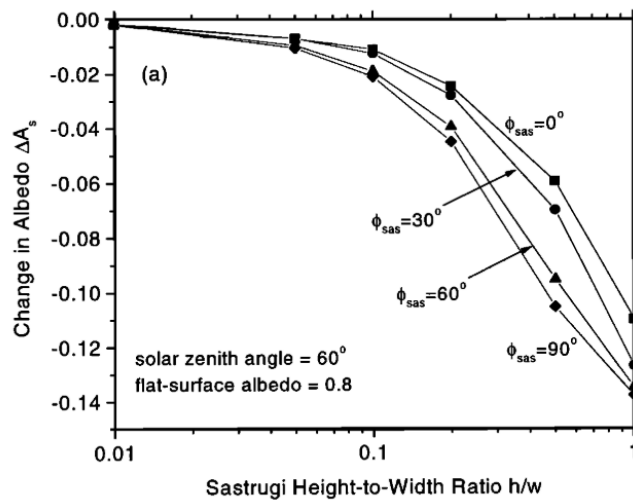

**Figure 2.** Figure 13 in Warren et al (1998). Effect of sastrugi on albedo, from the Monte-Carlo radiative transfer modeling of O'Rawe [1991]. Plotted is the change in albedo as a function of the height-to-width ratio of rectangular sastrugi with spacing equal to width. Simulations are performed with an illumination by a direct beam at  $60^\circ$  from the nadir, for four different sastrugi azimuths; flat-surface albedo = 0.8.

## General comments

**1. L29:** Regarding the sentence "For a typical alpine snowpack ...  $27 \text{ Wm}^2$ .", this estimation was the value at the site C based on the artificial rough surface. Reviewer is wondering if "a typical alpine snowpack" means the natural rough surface in the mountain regions. How does the artificial rough surface represent the natural snow surface in the mountain regions?

Even if the size of the artificial roughness features used in this study are not exaggerated compared to what can be observed in the French Alps, natural patterns in the field are strongly correlated to

the wind, sun exposition, and topography amongst others. The surface roughness pattern has high spatial variability in mountainous areas and is difficult to quantify in the field. Further studies (including *in situ* measurements) are needed to determine what is representative for a natural snow surface in Alpine areas, using photogrammetric measurements for instance, but this is out of the scope of the present study.

To be clearer in the abstract we changed the sentence as follows :

Line 28 : *«For a snowpack where we artificially created surface roughness, we showed that a broadband albedo decrease of 0.05 may cause an increase of the net short wave radiation of 80 % (from 15 W m<sup>-2</sup> to 27 W m<sup>-2</sup>). »*

**2. L40:** Snow grain shape is also one of the important factor to control the snow albedo (Tanikawa et al., 2006; Jin et al., 2008) in addition to the physical properties mentioned in the manuscript. Authors should add explanations and cite research papers.

- Jin et al. (2008): Snow optical properties for different particle shapes with application to snow grain size retrieval and MODIS/CERES radiance comparison over Antarctica, *Remote Sensing of Environment*, 112, 3563-3581.

- Tanikawa et al. (2006): Monte Carlo simulations of spectral albedo for artificial snowpacks composed of spherical and nonspherical particles, *Applied Optics*, 45, 5310-5319.

It is true that the impact of snow grain shape on snow albedo can be significant, and this question has been addressed by the team through several publications (Picard et al., 2009 ; Libois et al., 2013, 2014). We added this factor line 41, as follows (Line 40) :

*« Snow spectral albedo generally depends in a complex way on several factors, including 1) the snow physical and chemical properties, mainly the Specific Surface Area of snow grains (SSA, Gallet et al., 2009), **the snow grain shapes (Tanikawa et al., 2006; Jin et al., 2008; Libois et al., 2013, 2014)** and the concentration of snow Light Absorbing Particles (referred to as LAP, Skiles et al., 2018) »*

And we added the research papers in the reference section.

**3. L199:** What does LAP stand for?

The LAP acronym was described in the introduction Line 43 :

*« the concentration of snow Light Absorbing Particles (called LAP, Skiles et al., 2018)»*

LAP describes several types of impurities such as mineral dust, black carbon or algae. To be clearer, we changed the sentence Line 197 as follows :

*« the concentration of Light Absorbing Particles (called LAP), **such as mineral dust and black carbon**, was not measured although they strongly lower the spectral signature in the visible range (Warren, 1982) »*

**4. L201:** Reviewer is wondering if measured spectral albedo is relatively high at wavelength range 500–700 nm even in a contaminated snow. This comment might be related to the major one.

The high measured albedo in the visible is due to the presence of a slope facing the sun. This point is explained in detail in the point 1) of the Major Comments section.

**5. L202:** It would be difficult to say a following sentence "The albedo decrease in the 400-600 nm range is a clear structure of a high LAP concentration". Only small amount of black carbon causes a drastic albedo decrease in the visible regions. Authors should add/modify the explanation properly.

It is true that the presence of each LAP type (black carbon, mineral dust, etc.) causes a drastic albedo decrease. To be clearer, we modified the sentence line 201 as follows :

«The albedo decrease in the 400-600 nm range is a clear signature of the presence of snow impurities. Even a small amount of LAP led to a high decrease of the albedo in the visible domain (Tuzet et al 2019)..»

**6. L205:** Describe the reason why authors chose 700 nm and 1000 nm for the statistical results. The reason is not clear. For example, it would be better to select wavelengths used for satellite remote sensing.

Future work will address the application of the model over large-scale natural surfaces including the atmosphere, but for now the validity of this model for satellite remote sensing applications is out of the scope of this paper.

The selection of the two wavelengths (700nm and 1000nm) is explained by adding the following sentences:

Line 371: “The main goal of this study is to quantify the roughness effect on albedo values and to determine if this effect is frequency dependent. Therefore, statistical results are given at two frequencies: one in the visible domain at 700 nm and one in the NIR domain at 1000 nm. These wavelengths were chosen to be as representative as possible of each domain for the sensitivity analysis. The relation between roughness effect and SSA is investigated at 1000 nm since at this wavelength the albedo sensitivity to SSA is larger (Dominé et al., 2006).”

700 nm was chosen randomly but values are relatively stable in the 600-700 nm range.

**7. L210:** How did authors consider the effect of atmosphere in the radiative transfer calculation?

This is explained in the ‘simulation framework’ section (Sect 3.3). The effects of the atmosphere are not taken into account in the Monte Carlo algorithm. The only atmospheric parameter used in the model is the diffuse-to-total illumination ratio (which depends on atmospheric conditions) to compute the apparent albedo by combining the direct and diffuse albedo components. This parameter was measured in the field shortly after the albedo measurement by screening the sun to record the diffuse irradiance, the total irradiance being measured with the sensor looking upward (see Section 2.2, Line 179).

We added the following sentence after the equation 5,

Line 265: « where  $r_{diff-tot}(\lambda, \theta_s)$  is the ratio of diffuse-to-total illumination at wavelength  $\lambda$  and at  $\theta_s$ , measured in the field shortly after each albedo measurements. »

In order to be clearer in the ‘simulation framework’ section, we modified the sentence :

Line 353: «RSRT outputs the snow spectral albedo, either in direct or diffuse illumination conditions:  $\alpha_{dir,rough}(\lambda, \theta_s)$  and  $\alpha_{diff,rough}(\lambda)$ , respectively, considering that the plane of the mesh is perfectly flat. Then,  $\alpha_{dir,rough}(\lambda, \theta_s)$  and  $\alpha_{diff,rough}(\lambda)$  are combined with Eqs. (6) and (7) to simulate the apparent snow albedo of a titled rough surface, called  $\alpha_{sim,rough}(\lambda, \theta_s)$ , and therefore **the simulated apparent albedo accounts for the slope characteristics and the surface roughness. Each simulation assumes clear sky conditions, and no atmosphere is considered in the Monte Carlo algorithm. The only atmospheric parameter used in the model is the diffuse-to-total illumination ratio (which depends on atmospheric conditions). This parameter was measured in the field at each albedo acquisition (see Sect. 2.2). At our scale, the effect of the atmosphere is negligible between the sensor and the surface. Future work will focus on setting up the atmosphere in RSRT for applications over large-scale natural surfaces (mountainous areas).**»

**8. L230:** In general, the asymmetry factor (g) increased with increasing (decreasing) the snow grain size (SSA) in the near infrared regions. So, g should be linked with the snow grain size (or SSA). This assumption might lead to biases of spectral albedo simulation.

It is true that  $g$  should be directly linked to the SSA, but the asymmetry factor is difficult to measure in the field. In the RSRT model we use  $B$  (the absorption enhancement parameter) and  $g$  (the asymmetric factor) to describe the snow grain shape and these parameters are assumed to be constant (i.e. a single homogeneous layer). Nevertheless, we used values adapted for an Alpine snowpack and estimated by Libois et al 2014 as follows :

By combining simulations and measurements of reflectance and irradiance (and not visual observation of snow grains) on an extensive set of snow samples taken in the laboratory and in the field (French Alps and Antarctica), they experimentally found a  $B$  value adapted to describe an 'optical grain size'. Then using the correlation between  $B$  and  $1-g$  (see Fig. 1 Libois et al. 2014), they deduced  $g$ . Thus, they have shown that using  $B=1.6$  and  $g=0.86$  to model snow optical properties is more realistic rather than considering spherical grains as often done.

To be clearer, we added the following sentence Line 258:

*«  $B$  and  $g$  are the snow shape coefficients and are assumed to be constant (i.e. the snowpack is a single homogeneous layer). Theoretically,  $g$  should be directly linked with the SSA, but as  $g$  is difficult to measure in the field, we used values estimated by Libois et al. (2014), which combined simulations and in situ measurements of reflectance in Antarctica and the French Alps. They found that using  $B = 1.6$  and  $g = 0.86$  is more realistic to model snow optical properties rather than considering spherical grains as often done.»*

Picard et al. 2009 have shown that the uncertainty on SSA measured with reflectance is about 20 % if the snow grain shape is not known. But this value was over-estimated since calculated using two extrem theoretical shapes (spheres/cubics) that are not found in natural snow (which is more like a mixture). In the present study, we assumed that the error on measured SSA to be about 10% (as estimated by Arnaud et al. 2011), and the analysis of the impact of SSA uncertainties on our roughness effect is discussed in Section 4.3.1.

**9. L264:** It is not clear whether the roughness part (Monte Carlo algorithm) employs the single scattering properties (single scattering albedo, phase function and so on) and/or surface reflectance of snow or not. How does the photon decide "hit" or "not hit"? Random number with snow single scattering albedo or snow reflectance? How does next direction after the scattering (i.e. after the photon hits to the snow grain) decide? Detailed explanations are needed.

- To decide if the photon is absorbed or reflected, two configurations are available (KZ04 and Lambertian). The KZ04 configuration employs the single scattering properties while the Lambertian configuration uses a constant surface reflectance of snow (i.e. an ideal diffusion : albedo is the same, whatever the incidence angle). We detailed it in Step 2 (line 310), but to be clearer we introduced this notion earlier by adding the following sentence :

Line 291: *«Photons are either absorbed or reflected at each hit according to the facet albedo value (Iwabuchi, 2006), that is estimated with the single scattering properties in case of the KZ04 configuration, or as a constant snow reflectance in case of the Lambertian configuration.»*

- How does the photon decide "hit" or "not hit"?

In step 1 we detailed the process of 'hit' or 'not hit' by adding the following sentence :

Line 297: *«Basically, it uses a simple recursive intersection routine to test if the photon hits or does not hit the bounding volume, and when positive, the list of triangles is tested (Wald et al., 2007).»*

We added the following the reference:

Ingo Wald, Solomon Boulos, and Peter Shirley. 2007. Ray tracing deformable scenes using dynamic bounding volume hierarchies. *ACM Trans. Graph.* 26, 1 (January 2007), 6–es. DOI:<https://doi.org/10.1145/1189762.1206075>



- How does next direction after the scattering (i.e. after the photon hits to the snow grain) decide?

Each facet is treated as a snow surface, and the next direction is computed according to the BRDF distribution, depending of the incident angle and snow properties, whereby the next direction is sensitive to the asymmetry of the scattering. The scattering within a few degrees of the forward direction is much more probable than scattering to other angles (Warren, 1982).

The BRDF computation is detailed in Step 3, and we added explanations with the following sentence :

Line 310: «*Thus, the next direction after the scattering depends of the incident angle of the photon and snow properties. It is sensitive to the asymmetry of the scattering, and the scattering within few degrees of the forward direction is much more probable than scattering to other angles (Warren, 1982).*»

**10. L463:** In Figs. 8a and d, the results  $\Delta\alpha$  were not symmetry at  $\Delta\phi_r=0$ . The effect of surface slope caused the asymmetry of  $\Delta\alpha$  at  $\Delta\phi_r=0$ ? Explanations are needed.

The effect of surface slope in our sensitivity analysis is reduced by taking a smooth surface with a similar slope to that of the rough surface, so by computing rough-smooth albedo we canceled slope effects. In this case (experiment C), the asymmetry is more an albedo insensitivity to small variations of roughness orientation and it is explained by high SSA values (i.e. lower absorptions). The SSA impact is fully detailed in Section 4.3.1.

Line 539: «*However, for the C rough 90° experiment (Fig. 8b and 8e),  $\Delta\phi_r$  varies from 50° to 122° and  $\Delta\alpha_{obs}$  does not show a strongest albedo reduction around 90°. Similarly, for C rough 0° (Fig. 8a, and 8d),  $\Delta\alpha_{obs}$  were not symmetrical to  $\Delta\phi_r = 0°$ . This is caused by two contributions that overlap the roughness effects: the slope and SSA values. Here we selected a smooth surface with a similar slope to that of the rough surface, so as to minimize the impact of this contribution by comparing rough-smooth albedo ( $\Delta\alpha_{obs}$ ). The slope sensitivity to roughness effects is studied in Section 4.3.2. The SSA is particularly high for this experiment ( $\sim 100 \text{ m}^2 \text{ kg}^{-1}$ ). It induces lower absorptions (Warren et al., 1998), and may explain the albedo insensitivity to small variations of roughness orientation. Instead of a clear dependence between  $\Delta\alpha_{obs}$  and  $\Delta\phi_r$ ,  $\Delta\alpha_{obs}$  pattern shows oscillations, probably caused by the weak differences in snow properties between the smooth and the rough surfaces. Indeed, SSA was measured over the smooth surface to be representative, while SSA values over rough surfaces evolved with spatial variations in the concavities according to the received illumination. The SSA sensitivity to roughness effects on albedo measurements is investigated in Section 4.3.1. [...]*»

**11. L635:** This is a rough estimation in a net SW radiation because the validation of the proposed model would not be adequately tested in the visible and shortwave near-infrared region (> 1000 nm). In addition, the effect of snow impurity such as a black carbon and a dust was not considered in the estimation of the net SW radiation. As authors well know, the spectral snow albedo depends on the concentration of snow impurity in the visible region where solar radiation is larger in the relatively cloud free condition. Thus, there would be a large uncertainty in the estimation (there are many parameters to be considered in the estimation, e.g. snow layer (vertical) information). Reviewer supposes that this item is next step.

=> This is a discussion of the potential albedo impact on the radiative balance. Authors assume that this is a rough estimation in a net SW radiation, but there is a strong interest to have an order of magnitude of the roughness effect on the absorbed energy.

To be clearer, we modified some sentences, and added some explanations :

Line 29 in the abstract : « For a snowpack where we artificially created surface roughness, we showed that a broadband albedo decrease of 0.05 **may** cause an increase of the net short wave radiation of 80 % (from  $15 \text{ W m}^{-2}$  to  $27 \text{ W m}^{-2}$ ). »

Line 241: « A simple approach is applied to illustrate the impact of roughness on the quantity of energy absorbed in the snowpack (Sect. 3.4) »

Line 740: «The broadband albedo simulated by considering surface roughness is 0.05 lower than the one simulated with the smooth surface. It results to an increase of the  $SW_{net}$  from  $15 \text{ W m}^{-2}$  to  $27 \text{ W m}^{-2}$  caused by the presence of surface roughness. In other words, the energy absorbed by the snowpack may increase by almost a factor two (+80 %) with the presence of roughness. **Note that this is an illustration of the potential impact of roughness on the  $SW_{net}$ , more than a real estimate, because RSRT has not been fully validated at wavelength below 600 nm and above 1050 nm, and because we simulate artificial roughness which may not be representative of the whole alpine snowpack. Nevertheless, these results illustrate the necessity to consider surface roughness in the estimation of the surface energy budget. Further work and measurements are needed to validate the radiative balance simulation, and this is out of the scope of this study.**»
